# Supplementary material for: A novel messenger RNA signature as a prognostic biomarker for predicting relapse in pancreatic ductal adenocarcinoma
Source: PubMed Central journal article supplement (PMC5762289; doi:10.18632/oncotarget.22861), 2017-12-02
Supplement: oncotarget-08-110849-s001.pdf [file oncotarget-08-110849-s001.pdf]

# A novel messenger RNA signature as a prognostic biomarker for predicting relapse in pancreatic ductal adenocarcinoma

## SUPPLEMENTARY MATERIALS

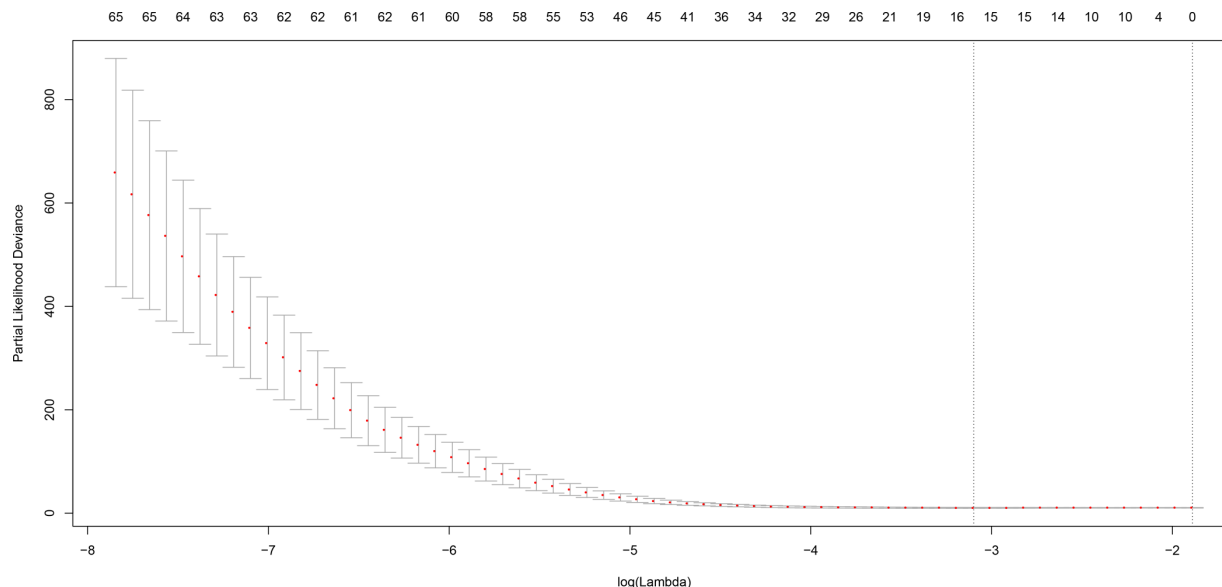

**Supplementary Figure 1: 10-fold cross-validation for tuning parameter selection in the LASSO model.** The solid vertical lines are partial likelihood deviance  $\pm$  standard error (SE). The dotted vertical lines are drawn at the optimal values by minimum criteria (lambda.min, left vertical dotted line) and 1-SE criteria (lambda.1se, right vertical dotted line). We plot the partial likelihood deviance versus  $\log(\lambda)$ , where  $\lambda$  is the tuning parameter. Herein, a value  $\lambda = 0.04513$  with  $\log(\lambda) = -3.098$  is chosen by 10-fold cross-validation via minimum criteria.

|                                                  | SLC4A4 | ACSL5 | F11   | MBOAT2 | FAM3B | CA4   | SERPIN5 | MT1M  | COL17A1 | DKK1  | SPOCK1 | AMIGO2 | BIK   | ARNTL2 | ASPM  | ERP27 | 16-mRNA |
|--------------------------------------------------|--------|-------|-------|--------|-------|-------|---------|-------|---------|-------|--------|--------|-------|--------|-------|-------|---------|
| Gender (Female/male)                             | 0.251  | 0.686 | 0.62  | 0.193  | 0.334 | 0.284 | 0.879   | 0.253 | 0.876   | 0.404 | 0.134  | 0.516  | 0.647 | 0.498  | 0.18  | 0.542 | 0.239   |
| Age (>=65 years vs <65)                          | 0.13   | 0.536 | 0.859 | 0.77   | 0.373 | 0.647 | 0.276   | 0.24  | 0.148   | 0.039 | 0.24   | 0.28   | 0.489 | 0.121  | 0.549 | 0.952 | 0.343   |
| History of diabetes (YES vs No)                  | 0.506  | 0.732 | 0.861 | 0.943  | 0.855 | 0.665 | 0.993   | 0.456 | 0.494   | 0.364 | 0.686  | 0.494  | 0.478 | 0.874  | 0.635 | 0.599 | 0.871   |
| History of chronic pancreatitis (YES vs No)      | 0.183  | 0     | 0.661 | 0.09   | 0.528 | 0.719 | 0.364   | 1     | 0.329   | 0.08  | 0.745  | 1      | 0.07  | 0.543  | 0.961 | 0.907 | 0.715   |
| Family history of cancer (YES vs No)             | 0.314  | 0.716 | 0.379 | 0.987  | 0.118 | 0.824 | 0.792   | 0.731 | 0.895   | 0.846 | 0.603  | 0.025  | 0.937 | 0.31   | 0.773 | 0.487 | 0.907   |
| Tobacco smoking history (YES vs No)              | 0.937  | 0.346 | 0.872 | 0.304  | 0.716 | 0.362 | 0.039   | 0.451 | 0.023   | 0.032 | 0.105  | 0.084  | 0.161 | 0.119  | 0.52  | 0.559 | 0.028   |
| Alcohol history documented (YES vs No)           | 0.158  | 0.792 | 0.538 | 0.466  | 0.275 | 0.714 | 0.984   | 0.233 | 0.124   | 0.197 | 0.398  | 0.093  | 0.264 | 0.744  | 0.546 | 0.918 | 0.392   |
| Location (tail+body vs head)                     | 0.967  | 0.845 | 0.103 | 0.401  | 0.01  | 0.532 | 0.616   | 0.118 | 0.472   | 0.387 | 0.068  | 0.956  | 0.767 | 0.201  | 0.843 | 0.131 | 0.598   |
| Histologic grade (G3+G4 vs G1+G2)                | 0.393  | 0.982 | 0.748 | 0.181  | 0.405 | 0.251 | 0.138   | 0.894 | 0.062   | 0.045 | 0.337  | 0.038  | 0.134 | 0.261  | 0.074 | 0.34  | 0.041   |
| Pathologic stage (III+IV vs II vs I)             | 0.3    | 0.564 | 0.378 | 0.823  | 0.076 | 0.892 | 0.016   | 0.43  | 0.009   | 0.064 | 0.592  | 0.111  | 0.065 | 0.197  | 0.78  | 0.004 | 0.214   |
| N stage (N1 vs N0)                               | 0.815  | 0.476 | 0.931 | 0.538  | 0.925 | 0.489 | 0.061   | 0.659 | 0.023   | 0.322 | 0.441  | 0.001  | 0.246 | 0.131  | 0.261 | 0.05  | 0.284   |
| T stage (T3+T4 vs T1+T2)                         | 0.087  | 0.148 | 0.021 | 0.101  | 0.733 | 0.315 | 0.001   | 0.036 | 0.001   | 0.002 | 0.356  | 0.067  | 0.413 | 0.025  | 0.802 | 0.604 | 0.015   |
| Maximum.tumor.dimension (>=3.5mm vs <3.5mm)      | 0.156  | 0.122 | 0.077 | 0.218  | 0.062 | 0.043 | 0.65    | 0.657 | 0.153   | 0.853 | 0.953  | 0.048  | 0.226 | 0.15   | 0.903 | 0.484 | 0.402   |
| Residual tumor (R1+R2 vs R0)                     | 0.572  | 0.195 | 0.665 | 0.017  | 0.97  | 0.211 | 0.013   | 0.628 | 0.007   | 0.149 | 0.917  | 0.084  | 0.023 | 0.59   | 0.216 | 0.184 | 0.029   |
| Radiation therapy (YES vs No)                    | 0.138  | 0.587 | 0.443 | 0.198  | 0.187 | 0.236 | 0.78    | 0.832 | 0.924   | 0.335 | 0.38   | 0.813  | 0.835 | 0.073  | 0.551 | 0.933 | 0.989   |
| Targeted molecular therapy (YES vs No)           | 0.317  | 0.157 | 0.1   | 0.559  | 0.244 | 0.022 | 0.181   | 0.042 | 0.518   | 0.237 | 0.244  | 0.244  | 0.764 | 0.431  | 0.75  | 0.353 | 0.233   |
| Primary therapy outcome success (SD+PD vs CR+PR) | 0.354  | 0.552 | 0.588 | 0.824  | 0.796 | 0.106 | 0.132   | 0.245 | 0.567   | 0.372 | 0.252  | 0.665  | 0.506 | 0.33   | 0.303 | 0.967 | 0.275   |
| AJCC8 T stage (T3+T4 vs T1+T2)                   | 0.103  | 0.374 | 0.006 | 0.045  | 0.017 | 0.004 | 0.342   | 0.599 | 0.103   | 0.992 | 0.528  | 0.123  | 0.127 | 0.193  | 0.775 | 0.127 | 0.269   |
| AJCC8 N stage (N2 vs N1 vs N0)                   | 0.975  | 0.28  | 0.972 | 0.165  | 0.664 | 0.687 | 0.177   | 0.788 | 0.125   | 0.041 | 0.616  | 0.004  | 0.408 | 0.442  | 0.587 | 0.228 | 0.462   |
| AJCC8 Pathologic Stage (III+IV vs II vs I)       | 0.922  | 0.435 | 0.35  | 0.196  | 0.422 | 0.877 | 0.125   | 0.814 | 0.011   | 0.049 | 0.831  | 0.005  | 0.057 | 0.682  | 0.743 | 0.346 | 0.288   |

**Supplementary Figure 2: The association of 16 mRNAs and the signature risk score with clinical characteristics.** Modules with  $p$  value  $< 0.05$  are marked with label colors. Pearson chi-squared test, corrected chi-squared test and Fisher's exact test are used.

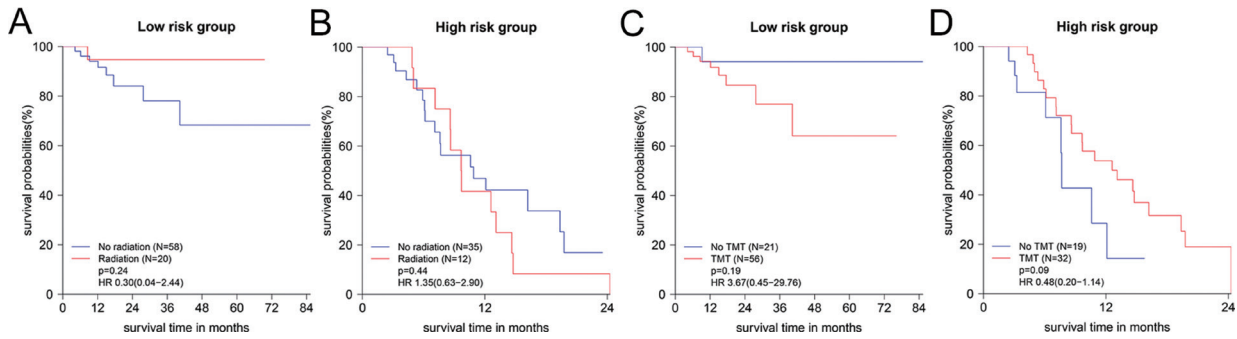

**Supplementary Figure 3: The impact of radiation and TMT on RFS in different risk groups.** (A–D) The Kaplan-Meier survival curves for PDAC patients in different subgroups stratified by 16-mRNA-based signature. TMT:targeted molecular therapy.

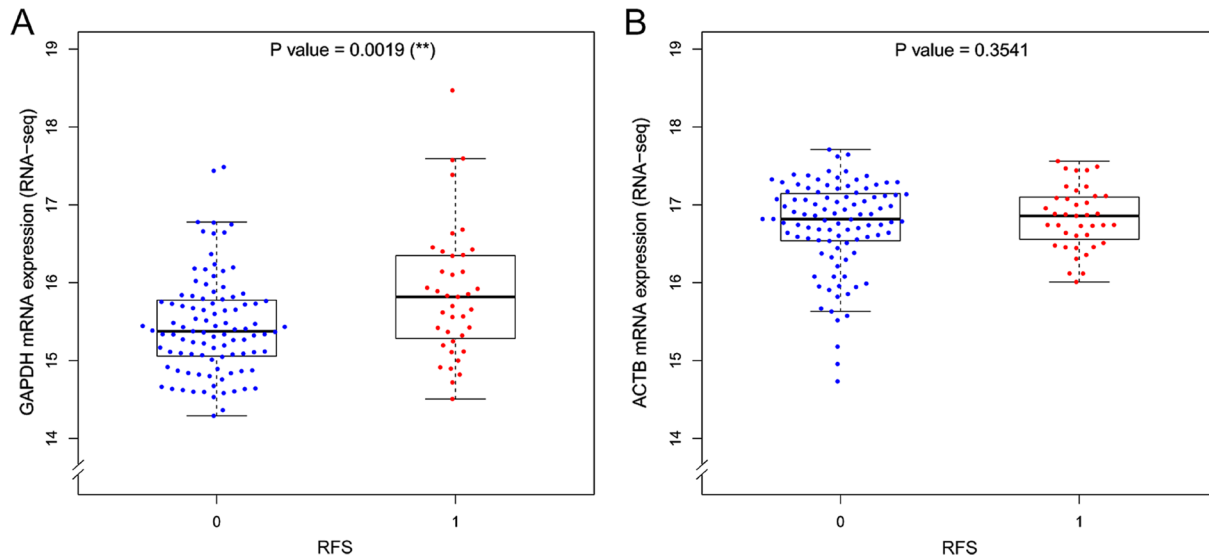

**Supplementary Figure 4: GAPDH and ACTB expression levels in non-recurrent group and recurrent group.**

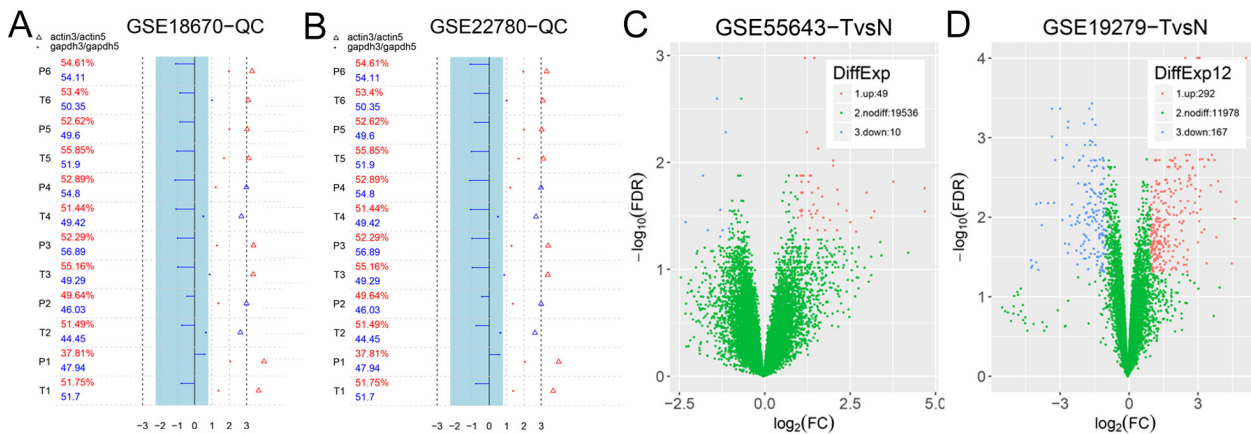

**Supplementary Figure 5: Four datasets excluded from the study.** (A–B) Quality control diagrams of two datasets. Two datasets (GSE22780 and GSE18670) do not meet quality control standards:  $actin3/actin5 < 3$  and  $gapdh3/gapdh5 < 1$ . We use a function *qc* to detect RNA quality and confirm hybridisation efficiency in the R package simpleaffy. (C–D) Volcano plots of DEGs in another two datasets. GSE55643 only identifies relatively small number of DEGs. The number of DEGs in GSE55643 is fewer than 100. GSE19279 is annotated with 12437 incomplete genes. Exclusion criteria are unanalyzable datasets; failure to meet quality control standards:  $actin3/actin5 < 3$  and  $gapdh3/gapdh5 < 1$  assessed by the function *qc* in R package simpleaffy; the small number of DEGs which is under 100; and incomplete annotated genes which accounts for less than 90% of genes within the total transcriptomes ( $n < 18000$ ).

**Supplementary Table 1: Clinical characteristics of 138 PDAC patients enrolled in the study**

| Characteristics                                 | Number             |
|-------------------------------------------------|--------------------|
| All                                             | 138                |
| Gender (male/female)                            | 76/62              |
| Age (<65/≥ 65 years)                            | 66/72              |
| History of diabetes(No/YES/NA)                  | 78/32/28           |
| History of chronic pancreatitis(No/YES/NA)      | 93/12/33           |
| Family history of cancer(No/YES/NA)             | 39/51/48           |
| Tobacco smoking history(No/YES/NA)              | 44/65/29           |
| Alcohol history documented(No/YES/NA)           | 51/77/10           |
| Location(head/body/tail/other)                  | 106/9/12/11        |
| Histologic grade(Gx/G1/G2/G3/G4)                | 1/26/71/38/2       |
| Pathologic stage(I/Ia/Ib/IIa/IIb/III/IV/NA)     | 1/6/11/20/94/2/3/1 |
| N stage(Nx/N0/N1/N1b/NA)                        | 3/37/96/1/1        |
| T stage(Tx/T1/T2/T3/T4)                         | 1/8/17/110/2       |
| Maximum tumor dimension(<35 mm/≥35 mm/NA)       | 62/70/6            |
| Residual tumor(Rx/R0/R1/R2/NA)                  | 4/83/45/1/5        |
| Radiation therapy(No/YES/NA)                    | 93/32/13           |
| Targeted molecular therapy(No/YES/NA)           | 40/88/10           |
| Primary therapy outcome success(CR/PR/SD/PD/NA) | 58/8/6/40/26       |
| AJCC8 T stage(T1/T2/T3/T4)                      | 9/76/51/2          |
| AJCC8 N stage(N0/N1/N2/NA)                      | 38/55/42/3         |
| AJCC8 Pathologic Stage(Ia/Ib/IIa/IIb/III/IV/NA) | 7/18/12/53/44/3/1  |

AJCC: American Joint Committee on Cancer; CR: Complete remission /response; PD: Progressive disease; PR: Partial remission/response; SD: Stable disease.

**Supplementary Table 2: T stage distribution of the AJCC 7th and 8th version staging system**

| 8th edition        | T1 | T2 | T3 | T4 | Total |
|--------------------|----|----|----|----|-------|
| <b>7th edition</b> |    |    |    |    |       |
| Tx                 | 0  | 1  | 0  | 0  | 1     |
| T1                 | 7  | 1  | 0  | 0  | 8     |
| T2                 | 1  | 11 | 5  | 0  | 17    |
| T3                 | 1  | 63 | 46 | 0  | 110   |
| T4                 | 0  | 0  | 0  | 2  | 2     |
| total              | 9  | 76 | 51 | 2  | 138   |

**Supplementary Table 3: N stage distribution of the AJCC 7th and 8th version staging system**

| <b>8th edition</b> | <b>N0</b> | <b>N1</b> | <b>N2</b> | <b>NA</b> | <b>Total</b> |
|--------------------|-----------|-----------|-----------|-----------|--------------|
| <b>7th edition</b> |           |           |           |           |              |
| Nx                 | 0         | 0         | 0         | 3         | 3            |
| N0                 | 37        | 0         | 0         | 0         | 37           |
| N1                 | 1         | 55        | 41        | 0         | 97           |
| NA                 | 0         | 0         | 1         | 0         | 1            |
| total              | 38        | 55        | 42        | 3         | 138          |

**Supplementary Table 4: Pathologic Stage distribution of the AJCC 7th and 8th version staging system**

| <b>8th edition</b> | <b>Ia</b> | <b>Ib</b> | <b>IIa</b> | <b>IIb</b> | <b>III</b> | <b>IV</b> | <b>NA</b> | <b>total</b> |
|--------------------|-----------|-----------|------------|------------|------------|-----------|-----------|--------------|
| <b>7th edition</b> |           |           |            |            |            |           |           |              |
| I                  | 0         | 0         | 0          | 0          | 1          | 0         | 0         | 1            |
| Ia                 | 5         | 1         | 0          | 0          | 0          | 0         | 0         | 6            |
| Ib                 | 1         | 5         | 4          | 0          | 1          | 0         | 0         | 11           |
| IIa                | 1         | 12        | 7          | 0          | 0          | 0         | 0         | 20           |
| IIb                | 0         | 0         | 1          | 53         | 40         | 0         | 0         | 94           |
| III                | 0         | 0         | 0          | 0          | 2          | 0         | 0         | 2            |
| IV                 | 0         | 0         | 0          | 0          | 0          | 3         | 0         | 3            |
| NA                 | 0         | 0         | 0          | 0          | 0          | 0         | 1         | 1            |
| total              | 7         | 18        | 12         | 53         | 44         | 3         | 1         | 138          |

**Supplementary Table 5: Results of time-dependent ROC curve analysis and COX univariable analysis.** See Supplementary\_Table\_5

**Supplementary Table 6: Result of stratified analysis of the 16-mRNA-based signature with RFS.** See Supplementary\_Table\_6

**Supplementary Table 7: R codes for LASSO COX regression model.** See Supplementary\_Table\_7

**Supplementary Table 8: The input file for running R codes for LASSO COX regression model.** See Supplementary\_Table\_8
